# Supplementary material
Source: publisher figshare collection journal article supplement (https://frontiersin.figshare.com/ndownloader/files/31144174)
Supplement: Supplementary file [file 31144174]

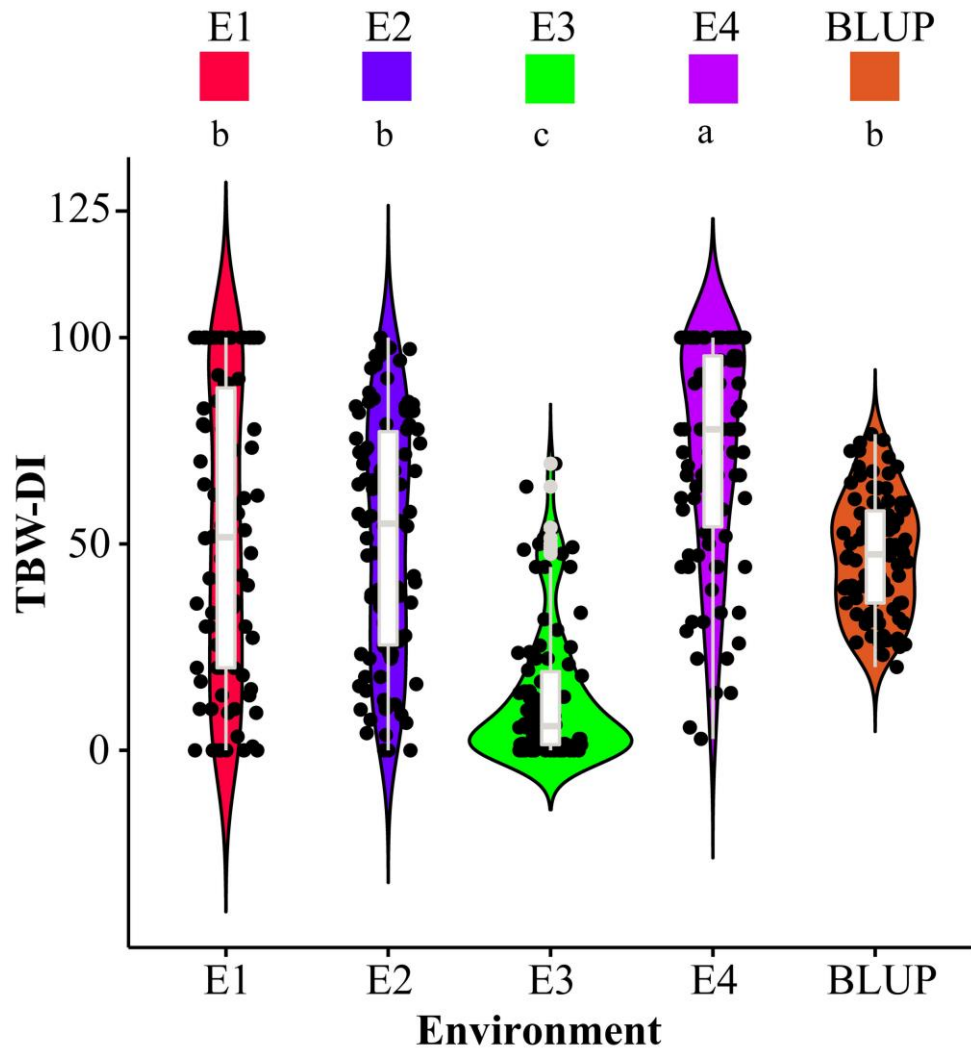

**Supplementary Figure 1. Frequency distribution of TBW-DI in 94 accessions in four environments (E1–E4) and BLUP.** The significant differences of TBW-DI among four environments/BLUP are tested using the LSD method at the 0.05 level of significance.
